# Supplementary material for: Silver ferrite: a superior oxidizer for thermite-driven biocidal nanoenergetic materials
Source: Royal Society of Chemistry journal article supplement (doi:10.1039/c8ra08997c), 2019-01-01
Supplement: c8ra08997c1.pdf [file c8ra08997c1.pdf]

# **Silver Ferrite: a superior oxidizer for thermite-driven biocidal nanoenergetic materials**

Tao Wu and Michael R. Zachariah\*

---

\* Address all correspondence to this author.  
e-mail: [mrz@umd.edu](mailto:mrz@umd.edu)

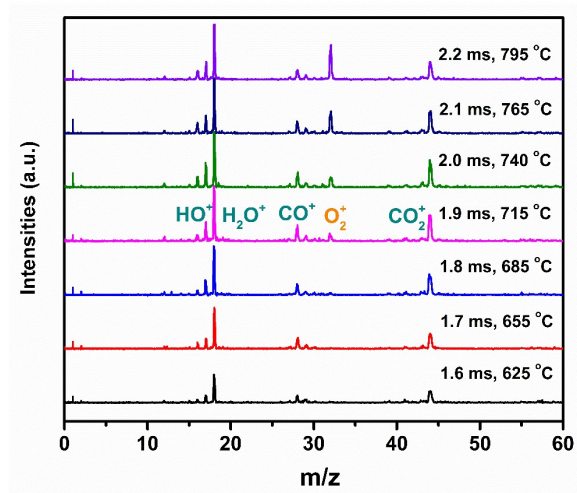

Figure S1. Multiple mass spectra of  $\text{AgFeO}_2$

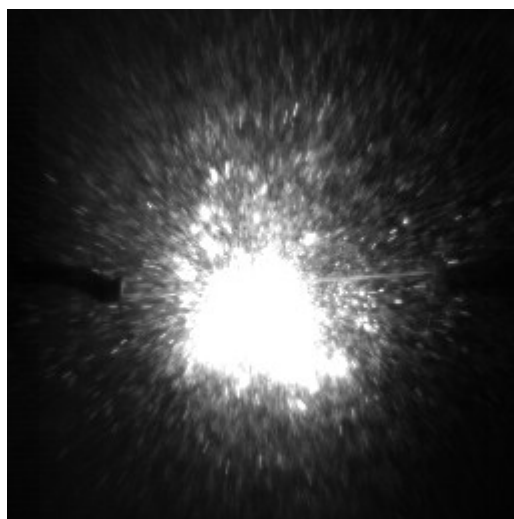

Figure S2. A snapshot of  $\text{Al/AgFeO}_2$  burning on a high-rate heating Pt wire in T-Jump chamber  
(in argon).

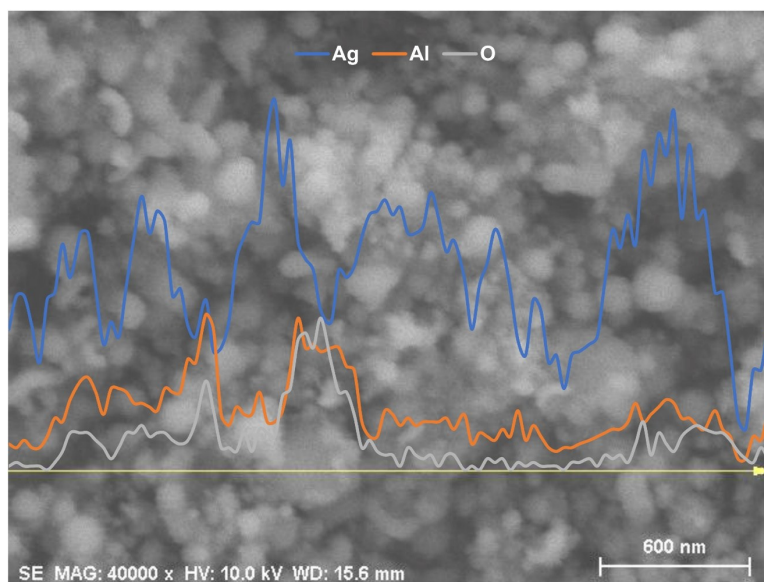

Figure S3. One-dimensional elemental line-scan using EDS of the Al/AgFeO<sub>2</sub> reaction product collected inside the combustion cell.
